# Supplementary material
Source: MDPI journal article supplement (https://www.mdpi.com/1996-1073/11/10/2686)
Supplement: s1 [file s1]

# Economic Consequences of Cooling Water Insufficiency in the Thermal Power Sector under Climatic Change Scenarios

Qian Zhou<sup>12</sup>, Naota Hanasaki<sup>\*1</sup>, Shinichiro Fujimori<sup>3,4</sup>

<sup>1</sup> Center for Global Environmental Research, National Institute for Environmental Studies, 16-2 Onogawa, Tsukuba, Ibaraki 305-8506, Japan

<sup>2</sup> School of Economics and Management, North China Electric Power University, Changping, Beijing 102206, China;

<sup>3</sup> Department of Environmental Engineering, Kyoto University, 615-8540 Kyoto, Japan

<sup>4</sup> Center for Social and Environmental Systems Research, National Institute for Environmental Studies, 16-2 Onogawa, Tsukuba, Ibaraki 305-8506, Japan

\* Correspondence: hanasaki@nies.go.jp; Tel.: +81-29-850-2929; Fax: +81-29-850-2960

## Supplemental Tables

**Table S1.** Regional classifications.

| Code | Regions               | 5 Aggregated Regions   |
|------|-----------------------|------------------------|
| JPN  | Japan                 | OECD90                 |
| CHN  | China                 | Asia                   |
| IND  | India                 | Asia                   |
| XSE  | Southeast Asia        | Asia                   |
| XSA  | Rest of Asia          | Asia                   |
| XOC  | Oceania               | OECD90                 |
| XE25 | EU25                  | OECD90                 |
| XER  | Rest of Europe        | REF                    |
| CIS  | Former Soviet Union   | REF                    |
| TUR  | Turkey                | OECD90                 |
| CAN  | Canada                | OECD90                 |
| USA  | United States         | OECD90                 |
| BRA  | Brazil                | Latin America          |
| XLM  | Rest of Latin America | Latin America          |
| XME  | Middle East           | Middle East and Africa |
| XNF  | North Africa          | Middle East and Africa |
| XAF  | Sub-Saharan Africa    | Middle East and Africa |

**Table S2.** Industrial classification.

|                                |                                         |                                                           |                                                       |                     |                                 |
|--------------------------------|-----------------------------------------|-----------------------------------------------------------|-------------------------------------------------------|---------------------|---------------------------------|
| 6 aggregated sectors           |                                         |                                                           |                                                       |                     |                                 |
| Agriculture                    | Rice                                    | Wheat                                                     | Other grains                                          | Oil seed crops      | Other crops                     |
|                                | Ruminant livestock                      | Non-ruminant livestock                                    | Other livestock and fisheries                         | Forestry            |                                 |
| Energy extraction              | Coal mining                             | Oil mining                                                | Gas mining                                            | Petroleum refinery  | Coal transformation             |
|                                | Biomass transformation (1st generation) | Biomass transformation (2nd generation with energy crops) | Biomass transformation (2nd generation with residues) | Gas distribution    |                                 |
|                                | Coal-fired power                        | Oil-fired power                                           | Gas-fired power                                       | Nuclear power       | Geothermal power                |
| Power                          | Advanced biomass-power generation       | Waste biomass power                                       | Other renewable energy power generation               |                     |                                 |
|                                | Hydroelectric power                     | Photovoltaic power                                        | Wind power                                            |                     |                                 |
| Manufacturing and construction | Mineral mining and other quarrying      | Food products                                             | Textiles, apparel, and leather                        | Wood products       | Paper, paper products, and pulp |
|                                | Chemical, plastic, and rubber products  | Iron and steel                                            | Nonferrous products                                   | Other manufacturing | Construction                    |
| Transport and communications   | Transport and communications            |                                                           |                                                       |                     |                                 |
| Service                        | Other service sectors                   | CCS service                                               |                                                       |                     |                                 |
